# Supplementary material for: A stable isotope labelling assisted LC-MS method for the determination of polyamines in micro-tissues of rice
Source: Royal Society of Chemistry journal article supplement (doi:10.1039/c7ay00805h), 2017-01-01

Stable Isotope Labelling Assisted LC-MS Method for Determination of  
Polyamines in Micro Tissues of Rice

Qiu-Yi Wang<sup>1</sup>, Tiantian Ye<sup>1</sup>, Shu-Jian Zheng<sup>1</sup>, Er-Cui Ye<sup>1</sup>, Ren-Qi Wang<sup>1,2</sup>, Yu-Qi

Feng<sup>1\*</sup>

*<sup>1</sup>Key Laboratory of Analytical Chemistry for Biology and Medicine (Ministry of Education), Department of Chemistry, Wuhan University, Wuhan 430072, PR China*

*<sup>2</sup> College of Chemistry and Chemical Engineering, Lanzhou University, Lanzhou 730000, China*

**Table S1.** Recoveries and intra- and inter-day precisions for the detection of PAs in root extracts and leaf extracts by stable isotope labeling combined UPLC-ESI-MS/MS analysis.

| Analytes | Spiked amount (pmol/mL) | Root extracts |           |              | Leaf extracts |           |              |
|----------|-------------------------|---------------|-----------|--------------|---------------|-----------|--------------|
|          |                         | RSD (%)       |           | Recovery (%) | RSD (%)       |           | Recovery (%) |
|          |                         | Intra-day     | Inter-day |              | Intra-day     | Inter-day |              |
|          |                         | (n=3)         | (n=3)     | (n=3)        | (n=3)         |           |              |
| Dap      | 2                       | 1.2           | 9.1       | 116.5        | 10.8          | 2.8       | 95.1         |
|          | 10                      | 5.7           | 13.0      | 113.1        | 13.9          | 1.1       | 92.3         |
|          | 100                     | 5.0           | 12.0      | 101.9        | 9.3           | 2.1       | 96.8         |
| Put      | 20                      | 4.1           | 6.7       | 88.3         | 3.2           | 2.2       | 83.7         |
|          | 100                     | 3.7           | 4.8       | 97.9         | 9.7           | 4.3       | 98.6         |
|          | 1000                    | 4.8           | 9.6       | 119.9        | 9.2           | 8.9       | 121.5        |
| Cad      | 2                       | 7.6           | 5.3       | 116.7        | 0.5           | 4.0       | 122.5        |
|          | 10                      | 5.6           | 1.6       | 126.4        | 7.6           | 3.5       | 122.4        |
|          | 100                     | 2.6           | 4.7       | 115.4        | 6.4           | 4.1       | 116.3        |
| Om       | 20                      | 13.5          | 10.1      | 97.5         | 11.8          | 8.5       | 100.6        |
|          | 100                     | 6.6           | 12.1      | 79.2         | 2.6           | 19        | 93.6         |
|          | 1000                    | 0.9           | 13.3      | 71.9         | 2.4           | 1.0       | 87.8         |
| Spd      | 20                      | 8.8           | 13.0      | 83.9         | 6.7           | 5.1       | 98.1         |
|          | 100                     | 11.4          | 16.2      | 89.0         | 10.8          | 2.1       | 91.7         |
|          | 1000                    | 5.0           | 17.1      | 127.5        | 8.5           | 3.2       | 124.4        |

---

|     |     |      |      |       |      |      |       |
|-----|-----|------|------|-------|------|------|-------|
|     | 2   | 3.5  | 14.1 | 116.9 | 10.8 | 6.1  | 126.7 |
| Spn | 10  | 10.2 | 16.1 | 89.8  | 8.3  | 9.8  | 79.9  |
|     | 100 | 2.1  | 14.1 | 108.9 | 18.9 | 19.5 | 85.2  |

---

**Figure S1**

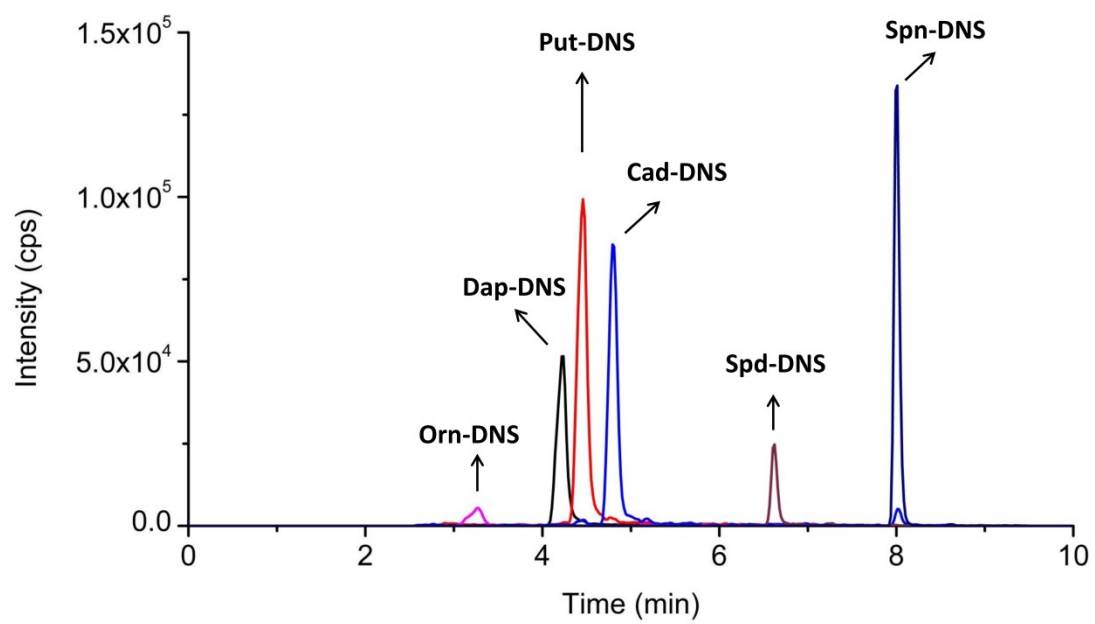

Figure S2

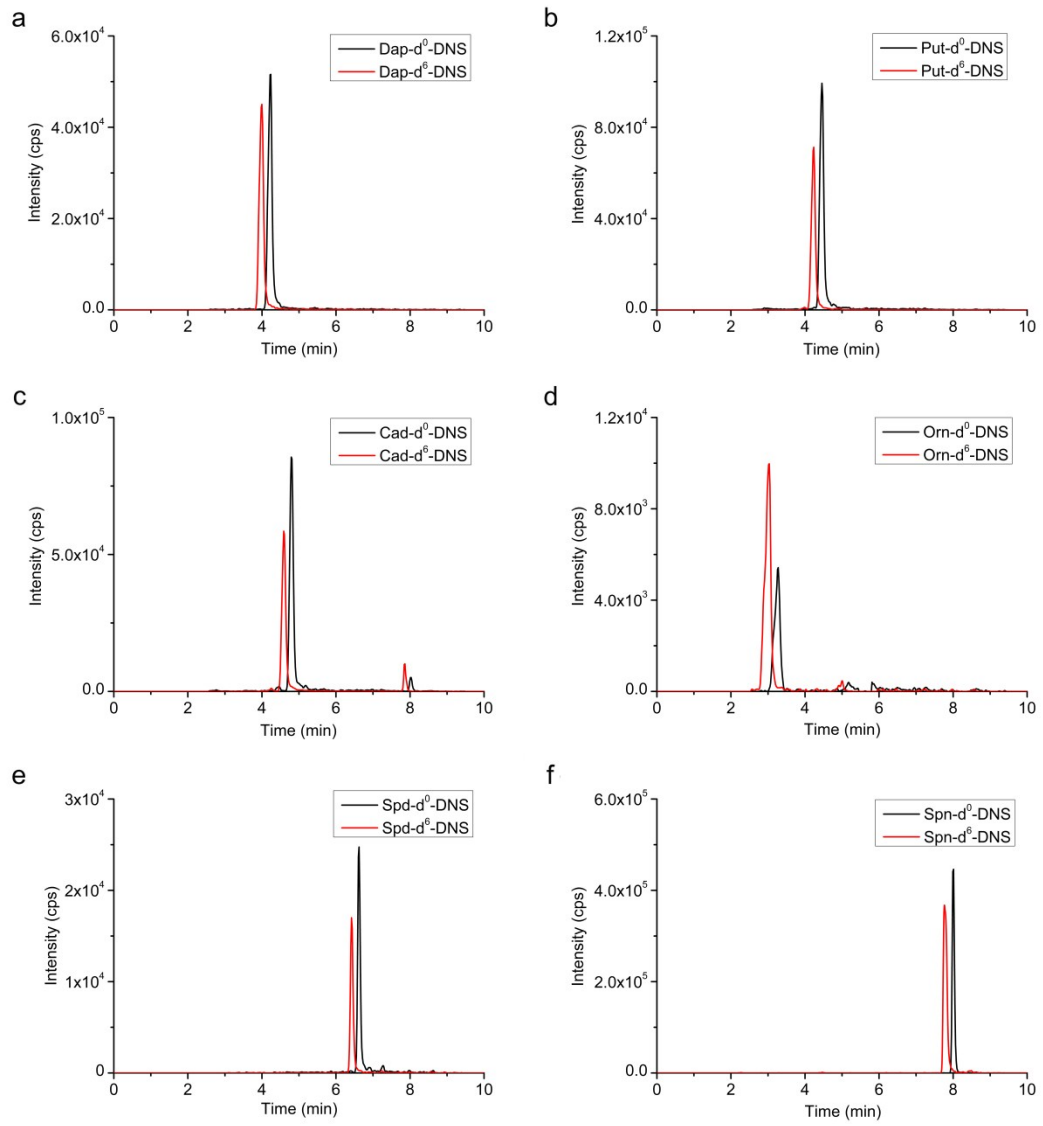

Supplement: c7ay00805h1.pdf [file c7ay00805h1.pdf]
